# Supplementary material
Source: PubMed Central journal article supplement (PMC7964174)
Supplement: 2061_tables.pdf [file 2061_tables.pdf]

## Appendix

**On-line Table 1: First-order textural features<sup>a</sup>**

| First-Order Texture Feature                                                               | Formula                                                                                                                                                                                                                                                                                                                                                               |   |   |   |   |   |   |   |   |   |   |   |   |   |   |   |   |   |   |   |   |   |   |   |   |   |
|-------------------------------------------------------------------------------------------|-----------------------------------------------------------------------------------------------------------------------------------------------------------------------------------------------------------------------------------------------------------------------------------------------------------------------------------------------------------------------|---|---|---|---|---|---|---|---|---|---|---|---|---|---|---|---|---|---|---|---|---|---|---|---|---|
| MGL                                                                                       | $MGL = \frac{1}{N_p} \sum_{ij} g(i, j)$                                                                                                                                                                                                                                                                                                                               |   |   |   |   |   |   |   |   |   |   |   |   |   |   |   |   |   |   |   |   |   |   |   |   |   |
| VGL                                                                                       | $VGL = \frac{1}{N_p} \sum_{ij} (g(i, j) - MGL)^2$                                                                                                                                                                                                                                                                                                                     |   |   |   |   |   |   |   |   |   |   |   |   |   |   |   |   |   |   |   |   |   |   |   |   |   |
| Gradient calculations: given a neighborhood of pixels, eg,                                |                                                                                                                                                                                                                                                                                                                                                                       |   |   |   |   |   |   |   |   |   |   |   |   |   |   |   |   |   |   |   |   |   |   |   |   |   |
|                                                                                           | <table border="0"> <tr> <td>A</td> <td>B</td> <td>C</td> <td>D</td> <td>E</td> </tr> <tr> <td>F</td> <td>G</td> <td>H</td> <td>I</td> <td>J</td> </tr> <tr> <td>K</td> <td>L</td> <td>M</td> <td>N</td> <td>O</td> </tr> <tr> <td>P</td> <td>Q</td> <td>R</td> <td>S</td> <td>T</td> </tr> <tr> <td>U</td> <td>V</td> <td>W</td> <td>X</td> <td>Y</td> </tr> </table> | A | B | C | D | E | F | G | H | I | J | K | L | M | N | O | P | Q | R | S | T | U | V | W | X | Y |
| A                                                                                         | B                                                                                                                                                                                                                                                                                                                                                                     | C | D | E |   |   |   |   |   |   |   |   |   |   |   |   |   |   |   |   |   |   |   |   |   |   |
| F                                                                                         | G                                                                                                                                                                                                                                                                                                                                                                     | H | I | J |   |   |   |   |   |   |   |   |   |   |   |   |   |   |   |   |   |   |   |   |   |   |
| K                                                                                         | L                                                                                                                                                                                                                                                                                                                                                                     | M | N | O |   |   |   |   |   |   |   |   |   |   |   |   |   |   |   |   |   |   |   |   |   |   |
| P                                                                                         | Q                                                                                                                                                                                                                                                                                                                                                                     | R | S | T |   |   |   |   |   |   |   |   |   |   |   |   |   |   |   |   |   |   |   |   |   |   |
| U                                                                                         | V                                                                                                                                                                                                                                                                                                                                                                     | W | X | Y |   |   |   |   |   |   |   |   |   |   |   |   |   |   |   |   |   |   |   |   |   |   |
| Absolute gradient value [ABSV( <i>i, j</i> )] $ABSV(i, j) = \sqrt{(W - C)^2 + (O - K)^2}$ |                                                                                                                                                                                                                                                                                                                                                                       |   |   |   |   |   |   |   |   |   |   |   |   |   |   |   |   |   |   |   |   |   |   |   |   |   |
| MGR                                                                                       | $MGR = \frac{1}{N_p} \sum_{i, j} ABSV(i, j)$                                                                                                                                                                                                                                                                                                                          |   |   |   |   |   |   |   |   |   |   |   |   |   |   |   |   |   |   |   |   |   |   |   |   |   |
| VGR                                                                                       | $VGR = \frac{1}{N_p} \sum_{i, j} (ABSV(i, j) - MGR)^2$                                                                                                                                                                                                                                                                                                                |   |   |   |   |   |   |   |   |   |   |   |   |   |   |   |   |   |   |   |   |   |   |   |   |   |

<sup>a</sup> Where  $g(i, j)$  indicates the gray-level intensity of pixel ( $i, j$ );  $N_p$ , the number of pixels; and  $N_g$ , the number of distinct gray levels<sup>9</sup> (hypothetical gradient example adapted from Lerski et al.<sup>17</sup>).

**On-line Table 2: GLCM textural features<sup>a</sup>**

| GLCM Texture Feature                                      | Formula                                                                                                                 |
|-----------------------------------------------------------|-------------------------------------------------------------------------------------------------------------------------|
| $f_1$ Angular second moment                               | $f_1 = \sum_{i=1}^{N_g} \sum_{j=1}^{N_g} \left( \frac{P(i, j)}{R} \right)^2$                                            |
| $f_2$ Contrast                                            | $f_2 = \sum_{n=0}^{N_g-1} n^2 \sum_{\substack{i=1 \\  i-j =n}}^{N_g} \sum_{j=1}^{N_g} \left( \frac{P(i, j)}{R} \right)$ |
| $f_3$ Correlation                                         | $f_3 = \frac{\sum_{i=1}^{N_g} \sum_{j=1}^{N_g} (ijP(i, j)/R) - \mu_x \mu_y}{\sigma_x \sigma_y}$                         |
| $f_4$ Sum of squares: variance                            | $f_4 = \sum_{j=1}^{N_g} \sum_{i=1}^{N_g} (i - \mu)^2 \left( \frac{P(i, j)}{R} \right)$                                  |
| $f_5$ Inverse difference moment                           | $f_5 = \sum_{i=1}^{N_g} \sum_{j=1}^{N_g} \frac{1}{1 + (i - j)^2} \left( \frac{P(i, j)}{R} \right)$                      |
| $f_6$ Sum average                                         | $f_6 = \sum_{i=2}^{2N_g} i p_{x+y}(i)$                                                                                  |
| $f_7$ Sum variance                                        | $f_7 = \sum_{i=2}^{2N_g} (1 - f_6)^2 p_{x+y}(i)$                                                                        |
| $f_8$ Sum entropy                                         | $f_8 = - \sum_{i=2}^{2N_g} p_{x+y}(i) \log\{p_{x+y}(i)\}$                                                               |
| $f_9$ Entropy                                             | $f_9 = - \sum_{i=1}^{N_g} \sum_{j=1}^{N_g} \frac{P(i, j)}{R} \log\left(\frac{P(i, j)}{R}\right)$                        |
| $f_{10}$ Difference variance                              | Variance of $P_{x-y}$                                                                                                   |
| $f_{11}$ Difference entropy                               | $f_{11} = - \sum_{i=0}^{N_g-1} p_{x-y}(i) \log\{p_{x-y}(i)\}$                                                           |
| $f_{12} + f_{13}$ Information measures of correlation     | $HXY = - \sum_{i=1}^{N_g} \sum_{j=1}^{N_g} \frac{P(i, j)}{R} \log\left(\frac{P(i, j)}{R}\right)$                        |
| Where $HX$ and $HY$ are entropies of $p_x$ and $p_y$ and: | $HXY1 = - \sum_{i=1}^{N_g} \sum_{j=1}^{N_g} \frac{P(i, j)}{R} \log\{p_x(i)p_y(j)\}$                                     |
|                                                           | $HXY2 = - \sum_{i=1}^{N_g} \sum_{j=1}^{N_g} p_x(i)p_y(j) \log\{p_x(i)p_y(j)\}$                                          |
|                                                           | $f_{12} = \frac{HXY - HXY1}{\max\{HX, HY\}}$                                                                            |
| such that:                                                | $f_{13} = (1 - \exp[-2.0(HXY2 - HXY)])^{1/2}$                                                                           |
| $f_{14}$ Maximal correlation coefficient                  | (second largest eigenvalue of $Q$ ) <sup>1/2</sup> , where                                                              |
|                                                           | $Q(i, j) = \sum_k \frac{p(i, k)p(j, k)}{p_x(i)p_y(k)}$                                                                  |

<sup>a</sup> Where  $P(i, j)$  indicates the joint probability of 2 pixels having particular co-occurring values  $i, j = 1, 2, \dots, N_g$ ;  $R$  indicates the total number of neighboring pixel pairs; and  $N_g$ , the number of distinct gray levels.  $\mu_x, \mu_y, \sigma_x,$  and  $\sigma_y$  indicate means and SDs of the row and column sums of the co-occurrence matrix.<sup>9</sup>

**On-line Table 3: RLM textural features<sup>a</sup>**

| RLM Textural Feature            | Formula                                                                                                               |
|---------------------------------|-----------------------------------------------------------------------------------------------------------------------|
| $RF_1$ Short runs emphasis      | $RF_1 = \frac{\sum_{i=1}^{N_g} \sum_{j=1}^{N_r} \frac{P(i, j)}{j^2}}{\sum_{i=1}^{N_g} \sum_{j=1}^{N_r} P(i, j)}$      |
| $RF_2$ Long runs emphasis       | $RF_2 = \frac{\sum_{i=1}^{N_g} \sum_{j=1}^{N_r} j^2 P(i, j)}{\sum_{i=1}^{N_g} \sum_{j=1}^{N_r} P(i, j)}$              |
| $RF_3$ Gray-level nonuniformity | $RF_3 = \frac{\sum_{i=1}^{N_g} \left( \sum_{j=1}^{N_r} P(i, j) \right)^2}{\sum_{i=1}^{N_g} \sum_{j=1}^{N_r} P(i, j)}$ |
| $RF_4$ Run-length nonuniformity | $RF_4 = \frac{\sum_{j=1}^{N_r} \left( \sum_{i=1}^{N_g} P(i, j) \right)^2}{\sum_{i=1}^{N_g} \sum_{j=1}^{N_r} P(i, j)}$ |
| $RF_5$ Run percentage           | $RF_5 = \sum_{i=1}^{N_g} \sum_{j=1}^{N_r} \frac{P(i, j)}{N_p}$                                                        |

<sup>a</sup> Where  $P(i, j)$  indicates the number of gray-level runs  $j$  pixels long for a given gray level;  $i = 1, 2, \dots, N_g$ ;  $N_p$ , the number of pixels; and  $N_g$ , the number of distinct gray levels.<sup>13</sup>
